# Supplementary material for: Drosophila epidermal cells are intrinsically mechanosensitive and modulate nociceptive behavioral outputs
Source: eLife. 2025 May 12;13:RP95379. doi: 10.7554/eLife.95379 (PMC12068870; doi:10.7554/eLife.95379)
Supplement: Source data 1. [file elife-95379-data1.xlsx]

## Sheet: Fig1A, Fig1S1H
Behavior	Fraction	Genotype
rolling	1	R27H06-Gal4 x UAS-CsChrimson
c-bend	0.428571	R27H06-Gal4 x UAS-CsChrimson
freeze	0.0714286	R27H06-Gal4 x UAS-CsChrimson
hunch	1	MHC-Gal4 x UAS-CsChrimson
c-bend	0.05	R15F01-Gal4 x UAS-CsChrimson
freeze	0.05	R15F01-Gal4 x UAS-CsChrimson
hunch	1	Repo-Gal4 x UAS-CsChrimson
c-bend	0.545455	R38F11-Gal4 x UAS-CsChrimson
rolling	0.363636	R38F11-Gal4 x UAS-CsChrimson
freeze	0.35	HML-Gal4 x UAS-CsChrimson
c-bend	0.05	HML-Gal4 x UAS-CsChrimson
rolling	0.05	HML-Gal4 x UAS-CsChrimson

## Sheet: Fig1B
Behavior	Fraction	Genotype
c-bend	0.416667	R32E11-Gal4 x UAS-CsChrimson
rolling	0.166667	R32E11-Gal4 x UAS-CsChrimson
hunch	0.166667	R32E11-Gal4 x UAS-CsChrimson
freeze	0.0666667	R77B09-Gal4 x UAS-CsChrimson
hunch	0.266667	R77B09-Gal4 x UAS-CsChrimson
c-bend	0.4	R77B09-Gal4 x UAS-CsChrimson
rolling	0.0666667	R77B09-Gal4 x UAS-CsChrimson
rolling	0.2	R51F01-Gal4 x UAS-CsChrimson
c-bend	0.4	R51F01-Gal4 x UAS-CsChrimson
freeze	0.15	R51F01-Gal4 x UAS-CsChrimson
c-bend	0.75	sr-Gal4 x UAS-CsChrimson
freeze	0.333333	sr-Gal4 x UAS-CsChrimson
hunch	0.25	sr-Gal4 x UAS-CsChrimson
c-bend	0.210526	hh-Gal4 x UAS-CsChrimson
freeze	0.105263	hh-Gal4 x UAS-CsChrimson
rolling	0.210526	hh-Gal4 x UAS-CsChrimson
hunch	0.111111	R23C11-Gal4 x UAS-CsChrimson
c-bend	0.555556	R23C11-Gal4 x UAS-CsChrimson
rolling	0.111111	R23C11-Gal4 x UAS-CsChrimson
c-bend	0.545455	R38F11-Gal4 x UAS-CsChrimson
rolling	0.363636	R38F11-Gal4 x UAS-CsChrimson
c-bend	0.666667	R51F10-Gal4 x UAS-CsChrimson
rolling	0.25	R51F10-Gal4 x UAS-CsChrimson

## Sheet: Fig1C
Genotype	25C		32C
	roller	total	roller	total
UAS-TRPA1	0	50	3	50
R27H06>TRPA1	0	50	38	50
R38F11>TRPA1	0	50	43	50
R38F11>TRPA1, elav-GAL80	1	50	41	50
R38F11>TRPA1, tsh-GAL80	0	50	35	50

## Sheet: Fig1S1I
Behavior	DurationInStim	Genotype
c-bend	2.591	R27H06-Gal4 x UAS-CsChrimson
c-bend	5.955	R27H06-Gal4 x UAS-CsChrimson
rolling	9.985	R27H06-Gal4 x UAS-CsChrimson
rolling	9.879	R27H06-Gal4 x UAS-CsChrimson
rolling	4.834	R27H06-Gal4 x UAS-CsChrimson
rolling	4.133	R27H06-Gal4 x UAS-CsChrimson
rolling	4.135	R27H06-Gal4 x UAS-CsChrimson
freeze	0.099	R27H06-Gal4 x UAS-CsChrimson
c-bend	7.299	R27H06-Gal4 x UAS-CsChrimson
c-bend	5.249	R27H06-Gal4 x UAS-CsChrimson
c-bend	3.449	R27H06-Gal4 x UAS-CsChrimson
c-bend	7.499	R27H06-Gal4 x UAS-CsChrimson
rolling	2.749	R27H06-Gal4 x UAS-CsChrimson
rolling	4.649	R27H06-Gal4 x UAS-CsChrimson
rolling	6.7	R27H06-Gal4 x UAS-CsChrimson
rolling	2.499	R27H06-Gal4 x UAS-CsChrimson
rolling	9.75	R27H06-Gal4 x UAS-CsChrimson
rolling	9.635	R27H06-Gal4 x UAS-CsChrimson
rolling	9.839	R27H06-Gal4 x UAS-CsChrimson
rolling	5.66	R27H06-Gal4 x UAS-CsChrimson
rolling	9.6	R27H06-Gal4 x UAS-CsChrimson
hunch	10.02	MHC-Gal4 x UAS-CsChrimson
hunch	10.05	MHC-Gal4 x UAS-CsChrimson
hunch	10.1	MHC-Gal4 x UAS-CsChrimson
hunch	10.09	MHC-Gal4 x UAS-CsChrimson
hunch	9.985	MHC-Gal4 x UAS-CsChrimson
hunch	9.95	MHC-Gal4 x UAS-CsChrimson
hunch	13.419	MHC-Gal4 x UAS-CsChrimson
hunch	9.95	MHC-Gal4 x UAS-CsChrimson
hunch	9.9	MHC-Gal4 x UAS-CsChrimson
hunch	10.7	MHC-Gal4 x UAS-CsChrimson
hunch	10	MHC-Gal4 x UAS-CsChrimson
hunch	9.9	MHC-Gal4 x UAS-CsChrimson
hunch	10.05	MHC-Gal4 x UAS-CsChrimson
hunch	10	MHC-Gal4 x UAS-CsChrimson
hunch	9.574	MHC-Gal4 x UAS-CsChrimson
hunch	9.714	MHC-Gal4 x UAS-CsChrimson
hunch	9.755	MHC-Gal4 x UAS-CsChrimson
hunch	10.11	MHC-Gal4 x UAS-CsChrimson
hunch	9.32	MHC-Gal4 x UAS-CsChrimson
hunch	9.775	MHC-Gal4 x UAS-CsChrimson
hunch	9.429	MHC-Gal4 x UAS-CsChrimson
freeze	0.799	R15F01-Gal4 x UAS-CsChrimson
c-bend	1.274	R15F01-Gal4 x UAS-CsChrimson
hunch	10.23	Repo-Gal4 x UAS-CsChrimson
hunch	10.02	Repo-Gal4 x UAS-CsChrimson
hunch	9.74	Repo-Gal4 x UAS-CsChrimson
hunch	9.564	Repo-Gal4 x UAS-CsChrimson
hunch	10.231	Repo-Gal4 x UAS-CsChrimson
hunch	10.09	Repo-Gal4 x UAS-CsChrimson
hunch	10.055	Repo-Gal4 x UAS-CsChrimson
hunch	9.78	Repo-Gal4 x UAS-CsChrimson
hunch	10.265	Repo-Gal4 x UAS-CsChrimson
hunch	9.81	Repo-Gal4 x UAS-CsChrimson
hunch	9.879	Repo-Gal4 x UAS-CsChrimson
hunch	9.214	Repo-Gal4 x UAS-CsChrimson
c-bend	0.949	R38F11-Gal4 x UAS-CsChrimson
rolling	1.749	R38F11-Gal4 x UAS-CsChrimson
c-bend	9.599	R38F11-Gal4 x UAS-CsChrimson
c-bend	2.573	R38F11-Gal4 x UAS-CsChrimson
c-bend	3.924	R38F11-Gal4 x UAS-CsChrimson
c-bend	5.8	R38F11-Gal4 x UAS-CsChrimson
c-bend	5.898	R38F11-Gal4 x UAS-CsChrimson
rolling	1.574	R38F11-Gal4 x UAS-CsChrimson
rolling	3.323	R38F11-Gal4 x UAS-CsChrimson
rolling	5.449	R38F11-Gal4 x UAS-CsChrimson
freeze	4.049	HML-Gal4 x UAS-CsChrimson
freeze	1.949	HML-Gal4 x UAS-CsChrimson
freeze	3.449	HML-Gal4 x UAS-CsChrimson
c-bend	0.199	HML-Gal4 x UAS-CsChrimson
rolling	4.199	HML-Gal4 x UAS-CsChrimson
freeze	3.79	HML-Gal4 x UAS-CsChrimson
freeze	2.449	HML-Gal4 x UAS-CsChrimson
freeze	3.404	HML-Gal4 x UAS-CsChrimson
freeze	3.076	HML-Gal4 x UAS-CsChrimson

## Sheet: Fig1S4B
C4da neuron dendrite length measurements
R38	luc RNAi	Chrimson	TRPA1	orai RNAi	Stim RNAi	UAS-Stim	shiTS
62343	47477	55512	59312	53284	57824	66656	61399
56940	59596	49417	62815	59348	66854	59488	53237
58006	64302	46043	53620	55252	60225	60394	57984
53699	60781	49553	50740	55500	59863	50507	52840
59842	59081	61541	49856	75638	54625	51543	50269
49872	55482	63781	55486	60389		55749
	51482

## Sheet: Fig1S4C
C4da neuron dendrite branchpoints
R38	luc RNAi	Chrimson	TRP	orai RNAi	Stim RNAi	UAS-Stim	ShiTS
1685	2018	1598	2124	2417	1826	1709	1435
1566	1727	1421	1854	1738	1716	1597	1643
1560	1477	1414	1725	1382	1435	1549	1711
1508	1653	1439	1640	1595	1698	1292	1575
1794	1744	1642	1585	1471	1911	1408	1818
1865	1658	1749	1740	1614	1586	1620	1620
1490	1579

## Sheet: Fig1S6C
Behavior	Fraction	Genotype	ATR
c-bend	0.903226	A58-Gal4, tsh-Gal80, cha-Gal80, UAS-Cschrimson	ATR+
backwards	0.645161	A58-Gal4, tsh-Gal80, cha-Gal80, UAS-Cschrimson	ATR+
rolling	0.322581	A58-Gal4, tsh-Gal80, cha-Gal80, UAS-Cschrimson	ATR+
freeze	0.322581	A58-Gal4, tsh-Gal80, cha-Gal80, UAS-Cschrimson	ATR+
hunch	0.225806	A58-Gal4, tsh-Gal80, cha-Gal80, UAS-Cschrimson	ATR+
c-bend	0.121212	A58-Gal4, tsh-Gal80, cha-Gal80, UAS-Cschrimson	ATR-
backwards	0.212121	A58-Gal4, tsh-Gal80, cha-Gal80, UAS-Cschrimson	ATR-
freeze	0.030303	A58-Gal4, tsh-Gal80, cha-Gal80, UAS-Cschrimson	ATR-

## Sheet: Fig1S6D
Behavior	DurationInStim	Genotype	ATR
freeze	25.749	A58-Gal4, tsh-Gal80, cha-Gal80, UAS-Cschrimson	ATR+
freeze	26.949	A58-Gal4, tsh-Gal80, cha-Gal80, UAS-Cschrimson	ATR+
freeze	28.899	A58-Gal4, tsh-Gal80, cha-Gal80, UAS-Cschrimson	ATR+
freeze	24.447	A58-Gal4, tsh-Gal80, cha-Gal80, UAS-Cschrimson	ATR+
hunch	0.499	A58-Gal4, tsh-Gal80, cha-Gal80, UAS-Cschrimson	ATR+
hunch	3.049	A58-Gal4, tsh-Gal80, cha-Gal80, UAS-Cschrimson	ATR+
hunch	0.449	A58-Gal4, tsh-Gal80, cha-Gal80, UAS-Cschrimson	ATR+
backwards	8.148	A58-Gal4, tsh-Gal80, cha-Gal80, UAS-Cschrimson	ATR+
backwards	26.699	A58-Gal4, tsh-Gal80, cha-Gal80, UAS-Cschrimson	ATR+
backwards	18.95	A58-Gal4, tsh-Gal80, cha-Gal80, UAS-Cschrimson	ATR+
backwards	24.999	A58-Gal4, tsh-Gal80, cha-Gal80, UAS-Cschrimson	ATR+
backwards	21.748	A58-Gal4, tsh-Gal80, cha-Gal80, UAS-Cschrimson	ATR+
backwards	20.998	A58-Gal4, tsh-Gal80, cha-Gal80, UAS-Cschrimson	ATR+
c-bend	7.149	A58-Gal4, tsh-Gal80, cha-Gal80, UAS-Cschrimson	ATR+
c-bend	0.349	A58-Gal4, tsh-Gal80, cha-Gal80, UAS-Cschrimson	ATR+
c-bend	10.499	A58-Gal4, tsh-Gal80, cha-Gal80, UAS-Cschrimson	ATR+
c-bend	4.249	A58-Gal4, tsh-Gal80, cha-Gal80, UAS-Cschrimson	ATR+
c-bend	0.849	A58-Gal4, tsh-Gal80, cha-Gal80, UAS-Cschrimson	ATR+
c-bend	0.699	A58-Gal4, tsh-Gal80, cha-Gal80, UAS-Cschrimson	ATR+
c-bend	1.049	A58-Gal4, tsh-Gal80, cha-Gal80, UAS-Cschrimson	ATR+
c-bend	1.999	A58-Gal4, tsh-Gal80, cha-Gal80, UAS-Cschrimson	ATR+
c-bend	4.449	A58-Gal4, tsh-Gal80, cha-Gal80, UAS-Cschrimson	ATR+
c-bend	8.398	A58-Gal4, tsh-Gal80, cha-Gal80, UAS-Cschrimson	ATR+
rolling	9.198	A58-Gal4, tsh-Gal80, cha-Gal80, UAS-Cschrimson	ATR+
rolling	0.899	A58-Gal4, tsh-Gal80, cha-Gal80, UAS-Cschrimson	ATR+
rolling	25.448	A58-Gal4, tsh-Gal80, cha-Gal80, UAS-Cschrimson	ATR+
freeze	4.699	A58-Gal4, tsh-Gal80, cha-Gal80, UAS-Cschrimson	ATR+
freeze	2.898	A58-Gal4, tsh-Gal80, cha-Gal80, UAS-Cschrimson	ATR+
freeze	5.149	A58-Gal4, tsh-Gal80, cha-Gal80, UAS-Cschrimson	ATR+
freeze	4.149	A58-Gal4, tsh-Gal80, cha-Gal80, UAS-Cschrimson	ATR+
freeze	18.349	A58-Gal4, tsh-Gal80, cha-Gal80, UAS-Cschrimson	ATR+
freeze	5.049	A58-Gal4, tsh-Gal80, cha-Gal80, UAS-Cschrimson	ATR+
hunch	0.949	A58-Gal4, tsh-Gal80, cha-Gal80, UAS-Cschrimson	ATR+
hunch	1.749	A58-Gal4, tsh-Gal80, cha-Gal80, UAS-Cschrimson	ATR+
hunch	0.999	A58-Gal4, tsh-Gal80, cha-Gal80, UAS-Cschrimson	ATR+
backwards	21.599	A58-Gal4, tsh-Gal80, cha-Gal80, UAS-Cschrimson	ATR+
backwards	26.949	A58-Gal4, tsh-Gal80, cha-Gal80, UAS-Cschrimson	ATR+
backwards	13.949	A58-Gal4, tsh-Gal80, cha-Gal80, UAS-Cschrimson	ATR+
backwards	25.449	A58-Gal4, tsh-Gal80, cha-Gal80, UAS-Cschrimson	ATR+
backwards	18.449	A58-Gal4, tsh-Gal80, cha-Gal80, UAS-Cschrimson	ATR+
backwards	1.949	A58-Gal4, tsh-Gal80, cha-Gal80, UAS-Cschrimson	ATR+
backwards	4.049	A58-Gal4, tsh-Gal80, cha-Gal80, UAS-Cschrimson	ATR+
backwards	26.549	A58-Gal4, tsh-Gal80, cha-Gal80, UAS-Cschrimson	ATR+
backwards	23.898	A58-Gal4, tsh-Gal80, cha-Gal80, UAS-Cschrimson	ATR+
backwards	23.549	A58-Gal4, tsh-Gal80, cha-Gal80, UAS-Cschrimson	ATR+
c-bend	2.849	A58-Gal4, tsh-Gal80, cha-Gal80, UAS-Cschrimson	ATR+
c-bend	2.999	A58-Gal4, tsh-Gal80, cha-Gal80, UAS-Cschrimson	ATR+
c-bend	11.297	A58-Gal4, tsh-Gal80, cha-Gal80, UAS-Cschrimson	ATR+
c-bend	1.599	A58-Gal4, tsh-Gal80, cha-Gal80, UAS-Cschrimson	ATR+
c-bend	17.898	A58-Gal4, tsh-Gal80, cha-Gal80, UAS-Cschrimson	ATR+
c-bend	6.349	A58-Gal4, tsh-Gal80, cha-Gal80, UAS-Cschrimson	ATR+
c-bend	23.797	A58-Gal4, tsh-Gal80, cha-Gal80, UAS-Cschrimson	ATR+
c-bend	29.799	A58-Gal4, tsh-Gal80, cha-Gal80, UAS-Cschrimson	ATR+
c-bend	3.249	A58-Gal4, tsh-Gal80, cha-Gal80, UAS-Cschrimson	ATR+
c-bend	0.949	A58-Gal4, tsh-Gal80, cha-Gal80, UAS-Cschrimson	ATR+
c-bend	5.249	A58-Gal4, tsh-Gal80, cha-Gal80, UAS-Cschrimson	ATR+
rolling	11.148	A58-Gal4, tsh-Gal80, cha-Gal80, UAS-Cschrimson	ATR+
hunch	27.026	A58-Gal4, tsh-Gal80, cha-Gal80, UAS-Cschrimson	ATR+
backwards	4.112	A58-Gal4, tsh-Gal80, cha-Gal80, UAS-Cschrimson	ATR+
backwards	22.822	A58-Gal4, tsh-Gal80, cha-Gal80, UAS-Cschrimson	ATR+
backwards	28.108	A58-Gal4, tsh-Gal80, cha-Gal80, UAS-Cschrimson	ATR+
backwards	23.004	A58-Gal4, tsh-Gal80, cha-Gal80, UAS-Cschrimson	ATR+
c-bend	3.843	A58-Gal4, tsh-Gal80, cha-Gal80, UAS-Cschrimson	ATR+
c-bend	1.681	A58-Gal4, tsh-Gal80, cha-Gal80, UAS-Cschrimson	ATR+
c-bend	25.343	A58-Gal4, tsh-Gal80, cha-Gal80, UAS-Cschrimson	ATR+
c-bend	16.274	A58-Gal4, tsh-Gal80, cha-Gal80, UAS-Cschrimson	ATR+
c-bend	2.701	A58-Gal4, tsh-Gal80, cha-Gal80, UAS-Cschrimson	ATR+
c-bend	9.609	A58-Gal4, tsh-Gal80, cha-Gal80, UAS-Cschrimson	ATR+
c-bend	1.74	A58-Gal4, tsh-Gal80, cha-Gal80, UAS-Cschrimson	ATR+
rolling	19.158	A58-Gal4, tsh-Gal80, cha-Gal80, UAS-Cschrimson	ATR+
rolling	5.284	A58-Gal4, tsh-Gal80, cha-Gal80, UAS-Cschrimson	ATR+
rolling	3.003	A58-Gal4, tsh-Gal80, cha-Gal80, UAS-Cschrimson	ATR+
rolling	8.408	A58-Gal4, tsh-Gal80, cha-Gal80, UAS-Cschrimson	ATR+
rolling	18.136	A58-Gal4, tsh-Gal80, cha-Gal80, UAS-Cschrimson	ATR+
rolling	6.965	A58-Gal4, tsh-Gal80, cha-Gal80, UAS-Cschrimson	ATR+
freeze	28.768	A58-Gal4, tsh-Gal80, cha-Gal80, UAS-Cschrimson	ATR-
backwards	5.884	A58-Gal4, tsh-Gal80, cha-Gal80, UAS-Cschrimson	ATR-
backwards	1.2	A58-Gal4, tsh-Gal80, cha-Gal80, UAS-Cschrimson	ATR-
c-bend	1.8	A58-Gal4, tsh-Gal80, cha-Gal80, UAS-Cschrimson	ATR-
backwards	4.024	A58-Gal4, tsh-Gal80, cha-Gal80, UAS-Cschrimson	ATR-
c-bend	3.302	A58-Gal4, tsh-Gal80, cha-Gal80, UAS-Cschrimson	ATR-
backwards	5.524	A58-Gal4, tsh-Gal80, cha-Gal80, UAS-Cschrimson	ATR-
backwards	12.73	A58-Gal4, tsh-Gal80, cha-Gal80, UAS-Cschrimson	ATR-
c-bend	5.404	A58-Gal4, tsh-Gal80, cha-Gal80, UAS-Cschrimson	ATR-
backwards	7.746	A58-Gal4, tsh-Gal80, cha-Gal80, UAS-Cschrimson	ATR-
backwards	2.942	A58-Gal4, tsh-Gal80, cha-Gal80, UAS-Cschrimson	ATR-
c-bend	4.264	A58-Gal4, tsh-Gal80, cha-Gal80, UAS-Cschrimson	ATR-

## Sheet: Fig1S6L
Behavior	Fraction	Genotype
c-bend	0.416667	R32E11-Gal4 x UAS-CsChrimson
rolling	0.166667	R32E11-Gal4 x UAS-CsChrimson
hunch	0.166667	R32E11-Gal4 x UAS-CsChrimson
freeze	0.0666667	R77B09-Gal4 x UAS-CsChrimson
hunch	0.266667	R77B09-Gal4 x UAS-CsChrimson
c-bend	0.4	R77B09-Gal4 x UAS-CsChrimson
rolling	0.0666667	R77B09-Gal4 x UAS-CsChrimson
rolling	0.2	R51F01-Gal4 x UAS-CsChrimson
c-bend	0.4	R51F01-Gal4 x UAS-CsChrimson
freeze	0.15	R51F01-Gal4 x UAS-CsChrimson
c-bend	0.75	sr-Gal4 x UAS-CsChrimson
freeze	0.333333	sr-Gal4 x UAS-CsChrimson
hunch	0.25	sr-Gal4 x UAS-CsChrimson
c-bend	0.210526	hh-Gal4 x UAS-CsChrimson
freeze	0.105263	hh-Gal4 x UAS-CsChrimson
rolling	0.210526	hh-Gal4 x UAS-CsChrimson
hunch	0.111111	R23C11-Gal4 x UAS-CsChrimson
c-bend	0.555556	R23C11-Gal4 x UAS-CsChrimson
rolling	0.111111	R23C11-Gal4 x UAS-CsChrimson
c-bend	0.545455	R38F11-Gal4 x UAS-CsChrimson
rolling	0.363636	R38F11-Gal4 x UAS-CsChrimson
c-bend	0.666667	R51F10-Gal4 x UAS-CsChrimson
rolling	0.25	R51F10-Gal4 x UAS-CsChrimson

## Sheet: Fig1S6M
Behavior	DurationInStim	Genotype
hunch	1.549	R32E11-Gal4 x UAS-CsChrimson
c-bend	5.099	R32E11-Gal4 x UAS-CsChrimson
c-bend	4.846	R32E11-Gal4 x UAS-CsChrimson
rolling	4.878	R32E11-Gal4 x UAS-CsChrimson
hunch	2.699	R32E11-Gal4 x UAS-CsChrimson
c-bend	2.949	R32E11-Gal4 x UAS-CsChrimson
c-bend	10.699	R32E11-Gal4 x UAS-CsChrimson
c-bend	10.149	R32E11-Gal4 x UAS-CsChrimson
rolling	1.649	R32E11-Gal4 x UAS-CsChrimson
hunch	1.009	R77B09-Gal4 x UAS-CsChrimson
c-bend	2.446	R77B09-Gal4 x UAS-CsChrimson
freeze	5.049	R77B09-Gal4 x UAS-CsChrimson
hunch	0.549	R77B09-Gal4 x UAS-CsChrimson
hunch	0.349	R77B09-Gal4 x UAS-CsChrimson
hunch	0.499	R77B09-Gal4 x UAS-CsChrimson
c-bend	2.249	R77B09-Gal4 x UAS-CsChrimson
c-bend	2.949	R77B09-Gal4 x UAS-CsChrimson
c-bend	2.299	R77B09-Gal4 x UAS-CsChrimson
c-bend	4.049	R77B09-Gal4 x UAS-CsChrimson
c-bend	0.999	R77B09-Gal4 x UAS-CsChrimson
rolling	3.199	R77B09-Gal4 x UAS-CsChrimson
c-bend	1.199	R51F01-Gal4 x UAS-CsChrimson
c-bend	2.049	R51F01-Gal4 x UAS-CsChrimson
c-bend	1.191	R51F01-Gal4 x UAS-CsChrimson
rolling	1.499	R51F01-Gal4 x UAS-CsChrimson
freeze	1.949	R51F01-Gal4 x UAS-CsChrimson
freeze	2.299	R51F01-Gal4 x UAS-CsChrimson
c-bend	2.521	R51F01-Gal4 x UAS-CsChrimson
rolling	3.649	R51F01-Gal4 x UAS-CsChrimson
freeze	1.425	R51F01-Gal4 x UAS-CsChrimson
c-bend	2.325	R51F01-Gal4 x UAS-CsChrimson
c-bend	4.697	R51F01-Gal4 x UAS-CsChrimson
c-bend	1.849	R51F01-Gal4 x UAS-CsChrimson
c-bend	1.595	R51F01-Gal4 x UAS-CsChrimson
rolling	5.106	R51F01-Gal4 x UAS-CsChrimson
rolling	1.573	R51F01-Gal4 x UAS-CsChrimson
freeze	2.48	sr-Gal4 x UAS-CsChrimson
hunch	1.649	sr-Gal4 x UAS-CsChrimson
hunch	0.299	sr-Gal4 x UAS-CsChrimson
hunch	0.299	sr-Gal4 x UAS-CsChrimson
c-bend	4.199	sr-Gal4 x UAS-CsChrimson
c-bend	6.949	sr-Gal4 x UAS-CsChrimson
c-bend	3.569	sr-Gal4 x UAS-CsChrimson
freeze	1.323	sr-Gal4 x UAS-CsChrimson
freeze	0.455	sr-Gal4 x UAS-CsChrimson
freeze	9.71	sr-Gal4 x UAS-CsChrimson
c-bend	9.81	sr-Gal4 x UAS-CsChrimson
c-bend	6.839	sr-Gal4 x UAS-CsChrimson
c-bend	6.049	sr-Gal4 x UAS-CsChrimson
c-bend	9.9	sr-Gal4 x UAS-CsChrimson
c-bend	10.05	sr-Gal4 x UAS-CsChrimson
c-bend	9.95	sr-Gal4 x UAS-CsChrimson
freeze	1.574	hh-Gal4 x UAS-CsChrimson
freeze	1.849	hh-Gal4 x UAS-CsChrimson
c-bend	2.099	hh-Gal4 x UAS-CsChrimson
c-bend	7.358	hh-Gal4 x UAS-CsChrimson
c-bend	3.149	hh-Gal4 x UAS-CsChrimson
c-bend	0.999	hh-Gal4 x UAS-CsChrimson
rolling	0.949	hh-Gal4 x UAS-CsChrimson
rolling	2.297	hh-Gal4 x UAS-CsChrimson
rolling	2.349	hh-Gal4 x UAS-CsChrimson
rolling	7.549	hh-Gal4 x UAS-CsChrimson
hunch	0.999	R23C11-Gal4 x UAS-CsChrimson
c-bend	3.399	R23C11-Gal4 x UAS-CsChrimson
c-bend	4.299	R23C11-Gal4 x UAS-CsChrimson
c-bend	4.699	R23C11-Gal4 x UAS-CsChrimson
c-bend	10.3	R23C11-Gal4 x UAS-CsChrimson
c-bend	1.599	R23C11-Gal4 x UAS-CsChrimson
rolling	1.349	R23C11-Gal4 x UAS-CsChrimson
c-bend	0.949	R38F11-Gal4 x UAS-CsChrimson
rolling	1.749	R38F11-Gal4 x UAS-CsChrimson
c-bend	9.599	R38F11-Gal4 x UAS-CsChrimson
c-bend	2.573	R38F11-Gal4 x UAS-CsChrimson
c-bend	3.924	R38F11-Gal4 x UAS-CsChrimson
c-bend	5.8	R38F11-Gal4 x UAS-CsChrimson
c-bend	5.898	R38F11-Gal4 x UAS-CsChrimson
rolling	1.574	R38F11-Gal4 x UAS-CsChrimson
rolling	3.323	R38F11-Gal4 x UAS-CsChrimson
rolling	5.449	R38F11-Gal4 x UAS-CsChrimson
c-bend	2.049	R51F10-Gal4 x UAS-CsChrimson
c-bend	2.549	R51F10-Gal4 x UAS-CsChrimson
c-bend	2.308	R51F10-Gal4 x UAS-CsChrimson
rolling	1.799	R51F10-Gal4 x UAS-CsChrimson
rolling	2.199	R51F10-Gal4 x UAS-CsChrimson
c-bend	1.699	R51F10-Gal4 x UAS-CsChrimson
c-bend	5.897	R51F10-Gal4 x UAS-CsChrimson
c-bend	3.149	R51F10-Gal4 x UAS-CsChrimson
c-bend	2.699	R51F10-Gal4 x UAS-CsChrimson
c-bend	2.599	R51F10-Gal4 x UAS-CsChrimson
rolling	2.499	R51F10-Gal4 x UAS-CsChrimson

[truncated: 90 more sheets: Fig2F, Fig2S1F, Fig2G, Fig2H, Fig2S1G, Fig3B ATR+, Fig3B ATR-, Fig3C ATR+, Fig3C ATR-, Fig3D ATR+, Fig3D ATR-, Fig3E ATR+, Fig3E ATR-, Fig3F, Fig3G, Fig3S2D, Fig3S2E, Fig4 A-D C4da, Fig4 A-D C4da+Epi, Fig4E-I, Fig4J …]
