# Supplementary material for: Drosophila epidermal cells are intrinsically mechanosensitive and modulate nociceptive behavioral outputs
Source: eLife journal article supplement (doi:10.7554/elife.95379), 2024-05-13
Supplement: supp2 [file elife-95379-supp2-v1.pdf]

**Supplementary File 2. Larval behaviors scored in this study**

| <b>Behavior</b>     | <b>Description / Criteria</b>                                                                            |
|---------------------|----------------------------------------------------------------------------------------------------------|
| Locomotion          | Continuous forward movement with smooth, regular peristalsis                                             |
| Pausing             | Break in locomotion, lasting less than 1 second                                                          |
| Freezing            | Break in locomotion that persists for longer than 1 second                                               |
| Hunching            | Contraction along the anterior-posterior axis; no forward / backward motion or curling                   |
| Backward locomotion | Anterior-to-posterior peristalsis accompanied by movement in reverse                                     |
| Writhing crawl      | Forward movement with anterior and posterior sweeping of the body, tilting onto the side axis            |
| C-bending           | Bending into a c-shape, with both head and tail bending in the same direction; includes incomplete rolls |
| Rearing             | Upwards bending or arching of anterior part of the body, with posterior part largely stationary          |
| Rolling             | Larva completes a full 360-degree rotation of its body                                                   |
